1           **Efficiency of *Salicornia neei* in removing nitrogen and producing**  
2                           **biomass from a hypersaline and artificial wetland to treat**  
3                                           **aquaculture effluent.**

4                           Mónica R. Diaz<sup>1</sup>, Andrea Osses<sup>1</sup>, Jaime Orellana<sup>2</sup>, José A. Gallardo<sup>1\*</sup>

5                                           <https://orcid.org/0000-0002-7717-8726>.

6           1 Escuela de Ciencias del Mar, Pontificia Universidad Católica de Valparaíso, Valparaíso,  
7                                                                                           Chile.

8                           2 Erwin Sander Elektroapparatebau GmbH, Uetze-Eltze, Germany

9                           \* Corresponding authors: [jose.gallardo@pucv.cl](mailto:jose.gallardo@pucv.cl) (José A. Gallardo).

10  
11           **Abstract**

12           **Background:** One of the main challenges for the sustainability of land-based marine  
13           aquaculture systems is the treatment of saline effluent saturated with nitrogenous waste.  
14           In this study, we evaluated the potential of *Salicornia neei*, a halophyte plant native to  
15           South America, to remove nitrogen and produce biomass in sandy substrate with nitrogen  
16           concentrations similar to marine aquaculture effluent. Plants were collected from the  
17           natural environment and cultivated under three treatments: 1) seawater fertilized with  
18           nitrate + ammonium (Nit+Amm); 2) seawater fertilized with nitrate (Nit); and 3) seawater  
19           without fertilizer (Control).

20           **Results:** The nitrogen removal rate increased from 1.67 to 2.76 mg L<sup>-1</sup> d<sup>-1</sup> and from 1.95  
21           to 2.96 mg L<sup>-1</sup> d<sup>-1</sup> in the Nit+Amm and Nit treatments, respectively. In the two treatments,  
22           nitrogen removal efficiency varied between 87 ± 0.39 and 92 ± 0.40%. The salinity  
23           increased from 40 to 52 g L<sup>-1</sup> of NaCl during the experiment, with no observed detrimental

24 effects on the nitrogen removal efficiency. At the end of the crop cycle, the biomass  
25 production was not significantly different between the treatments of Nit+Amm and Nit  
26 (mean Nit+Amm =  $3,584 \pm 249.3$  g; mean Nit  $3,004 \pm 249.3$  g) but was different with  
27 respect to the control (mean Control =  $1,527 \pm 70.0$  g).

28 **Conclusions:** Our results demonstrate that artificial wetlands of *S. neei* can be used for  
29 wastewater treatment in marine aquaculture and for biomass production in South  
30 America.

31  
32 **Keywords:** Aquaculture Effluents, Halophyte, Nitrogen Accumulation, Saline effluent,  
33 Sustainable Aquaculture.

34

35

36

37

38

39

40

41

42

43

44

45

46

47

## 48 **Background**

49 Aquaculture provides nearly 50% of the world's fish production, and it is expected to  
50 increase to 60% by 2030 due to the growing demand for marine fishery products [1].  
51 Land-based marine aquaculture systems will play an important role in meeting this  
52 demand and will also do so in a more environmentally sustainable way regarding marine  
53 aquaculture in the ocean [2, 3]. However, the development of marine recirculating  
54 aquaculture systems (RAS) is limited by the ability to efficiently treat saline wastewater,  
55 which accumulates a large amount of nitrogen compounds derived from the metabolism of  
56 culture organisms [3-5]. In these RAS, the removal of nitrogen compounds, mainly  
57 ammonium ( $\text{NH}_4^+$ ) and ammonia ( $\text{NH}_3$ -), becomes a priority for elimination because they  
58 quickly deteriorate the water quality and cause negative effects on the culture [6, 7].  
59 Biofilters that promote the conversion of ionized and deionized ammonium to nitrate  
60 ( $\text{NO}_3^-$ ) are usually used for this purpose [8, 9].  $\text{NO}_3^-$  is not very toxic to most cultured  
61 organisms [10, 11], with tolerable accumulated concentrations reported between 120 mg  
62  $\text{L}^{-1}$  of  $\text{NO}_3^-$  and 150 mg  $\text{L}^{-1}$  of  $\text{NO}_3^-$  in marine RASs [12].  
63 Recent developments of integrated systems allow the use of RAS waste products as  
64 nutrients, coupling different water loops with the main fish production water system [13].  
65 To take advantage of these waste products, such as nitrogen compounds that accumulate  
66 in marine RAS, the use of artificial wetlands with facultative or obligate halophytes has  
67 been proposed [14-16]. Halophyte plants have the ability to absorb different forms of N,  
68 depending on different environmental factors such as the availability of  $\text{CO}_2$  [17]. For  
69 example, some species of the genus *Spartina* show a higher affinity for  $\text{NH}_4^+$  consumption  
70 [18, 19], while others like *Juncus maritimus*, have a marked preference for  $\text{NO}_3^-$ , even in

71 substrates that contained high availability of  $\text{NH}_4^+$  [20]. Also, if the plants are grown in  
72 lysimeters or wetland, the interaction with soil, microorganism and plant have a higher  
73 potential to remove nitrogen compounds and produce biomass, which can be used as  
74 animal feed or human food [21, 22], and in the production of biofuels or by-products of  
75 interest to the pharmaceutical industry [2, 5, 15, 23, 24], among others. Additionally, it has  
76 been demonstrated that these systems are also efficient in removing residual phosphates  
77 from RASs [2, 15, 23, 25-27].

78 *Salicornia neei* is a succulent hydrohalophyte of herbaceous habit, native to South  
79 America and abundantly distributed on the South Pacific coast, where much of the  
80 marine aquaculture production in South America is concentrated [28]. *S. neei* is used as  
81 a gourmet food and is a type of emerging crop in the coastal zone of Chile. This plant has  
82 been described as containing high amounts of nutrients and important functional  
83 metabolites [22]. Additionally, physiological studies have been performed to observe  
84 germination patterns [29] and changes in the concentration of metabolites and  
85 antioxidants when exposed to different salinity gradients [30].

86 The objective of this study was to evaluate the capacity of the halophyte *S. neei* for use  
87 as a sink for dissolved nitrogen compounds in effluent from land-based marine  
88 aquaculture systems and to simultaneously evaluate the resulting biomass production.  
89 The data obtained in this study will allow us to establish whether *S. neei* is a plant  
90 suitable for treating land-based marine aquaculture effluent with the potential for use in  
91 marine recirculating aquaculture systems.

92

93

## 94 **Methods**

### 95 **Collection of plant material and acclimatization**

96 In July 2014, 100 *Salicornia neei* plants with fully developed roots and shoots were  
97 collected in the “Salinas de Puyalli” wetland, located in the commune of Papudo,  
98 Valparaíso Region, Chile (32° 24' 54" S, 71° 22' 43" W) and subsequently transferred to  
99 the “Laboratorio Experimental de Acuicultura” of the Pontificia Universidad Católica de  
100 Valparaíso, in Valparaíso, Chile (33° 1' 21" S, 71° 37' 57" W). Plants were sown in sand  
101 beds and irrigated with Hoagland solution once a week for 10 weeks. Once the plants  
102 adapted and recovered their vigour, they were transferred to the experimental unit.

103

### 104 **Experimental unit**

105 The experimental unit consisted of three RAS, each composed of three drainage  
106 lysimeters. Each lysimeter was housed in a polyethylene container measuring 0.5 m x 0.6  
107 m x 0.6 m (length x width x depth) with a surface area of 0.9 m<sup>2</sup> and a total area of 2.7 m<sup>2</sup>.  
108 A leachate collection system was installed in each lysimeter, consisting of a perforated  
109 pipe at the bottom to collect the water, followed by a layer of gravel with a diameter of 0.5  
110 cm and height of 15 cm and polyethylene mesh with 0.3 mm pore size to cover the gravel.  
111 For the substrate, coarse sand was used until reaching 35 cm high (Fig. 1). Each RAS  
112 was connected to a nutrient storage, which in turn was fed by a main tank that contained  
113 filtered seawater. Each nutrient storage tank was equipped with an aeration pump to  
114 promote biological nitrification processes. The irrigation water supply (influent) was  
115 performed with a 0.5 HP centrifugal pump (Humboldt, TPM60). Each RAS was supplied  
116 daily with 27 litres of water through a drip irrigation system, programmed to run for 15

117 minutes at 09:00 and at 17:00 hrs. Drainage water (effluent) was returned to the  
118 respective collection tanks of each system to close the recirculating water loop.

119

## 120 **Experimental design**

121 The *S. neei* performance regarding removal of nitrogen compounds and biomass  
122 production was evaluated for 74 days under three irrigation treatments: 1) seawater  
123 fertilized with nitrate + ammonium (Nit+Amm); 2) seawater fertilized with nitrate (Nit); and  
124 3) seawater without fertilizer (Con). The nutrient concentrations in each irrigation water  
125 supply were designed according to the typical average concentrations of ammonium  
126 ( $\text{NH}_4^+$ ) and nitrate ( $\text{NO}_3^-$ ) reported in land-based marine aquaculture effluent  
127 [31, 32]. The following concentrations were used: Nit+Amm = 1 mg L<sup>-1</sup> of TAN (total  
128 ammonia nitrogen) and 100 mg L<sup>-1</sup> of  $\text{NO}_3^-$ -N; Nit = 100 mg L<sup>-1</sup> of  $\text{NO}_3^-$ -N; and Control  
129 (Con) = no fertilizer. The nutrient solution for each RAS was prepared directly in each  
130 collection tank and was completely renewed every 14-15 days. Nutrient removal rate (RR)  
131 was calculated as:  $\text{RR} = (C_i - C_o)$ , Nutrient removal efficiency (RE) was calculated as:  $\text{RE}$   
132  $= (C_i - C_o) / C_i * 100$  where:  $C_i$  = concentration in the influent water;  $C_o$  = concentration in  
133 the effluent water.

134 The physico-chemical parameters of water quality were recorded directly from the  
135 drainage water during the first eight consecutive days after nutrient addition. The  
136 estimation of  $\text{NO}_3^-$ -N concentration was performed using the cadmium reduction method.  
137 Additionally, temperature, oxygen, conductivity, salinity and pH were measured as water  
138 quality indicators. These parameters were measured using a HACH multiparameter probe  
139 (HQ40). Biomass (fresh weight) was recorded at the beginning and at the end of the  
140 experiment using a scale (Jadever, JWE-6K). The data on ambient temperature, rainfall

141 and relative humidity were sourced from climate records of the Chilean Meteorological  
142 Office (Torquemada-Viña del Mar Station) (Fig. 2).

143

#### 144 **Statistical analysis**

145 First, the means of nitrogen removal and biomass formation were compared using a  
146 one-way ANOVA (RStudio, Ver 3.6.0. probabilities of  $p < 0.05$  were considered significant.

147 Additionally, to obtain a clearer view of the change in nitrogen concentration in the  
148 measurements, the Pearson correlation coefficient was used, and the data that showed a  
149 negative linear relationship were subsequently analyzed using the linear model (LM).

150 Finally, the residuals were verified, determining their normality and the homogeneity of  
151 the variance (homoscedasticity). The LM analysis provided the removal rate (slope) and  
152 the initial concentration (intercept) for the proposed treatments and the control.

153

154

## 155 **Results**

### 156 **RAS environmental conditions and parameters**

157 During the 74 days of culture, the ambient temperature and relative humidity conditions  
158 and the temperature, pH and salinity of the cultivation system showed different levels of  
159 variability, and no rainfall was recorded during the experiment. The ambient temperature  
160 had a mean of  $16 \pm 4$  °C but was highly variable during the day with extreme values of 9  
161 and 31 °C, while the relative humidity was  $77.8 \pm 8.7\%$ , with extreme values of 60% and  
162 95% (Fig. 2). The temperature in the culture systems was usually higher than the ambient  
163 temperature, with a mean of  $20.5 \pm 1.24$  °C and a range of 19.1 to 21.7 °C, with no  
164 observed differences between treatments (Table 1). The pH remained relatively constant  
165 and without differences between treatments, while the salinity had a noticeable increase  
166 from a mean of 40 g L<sup>-1</sup> of NaCl on day 1 to a mean of  $51.5 \pm 0.19$  g L<sup>-1</sup> of NaCl at the end  
167 of the experiment (Table 1). No significant differences in salinity between treatments were  
168 observed ( $p < 0.05$ ).

169

### 170 **Nitrogen removal, growth and biomass formation**

171 Nitrate removal was high from the start of cultivation and had a clear tendency to increase  
172 as biomass production increased (Fig. 3, Fig. 4). Specifically, at the beginning of the  
173 culture, the nitrogen removal rate was between 1.67 and 1.95 mg L<sup>-1</sup> d<sup>-1</sup>, and at the end of  
174 the culture, it increased to 2.76 and 2.96 mg L<sup>-1</sup> d<sup>-1</sup> in the Nit+Amm and Nit treatments,  
175 respectively, with no significant differences observed between treatments. Consequently,  
176 the nitrogen removal efficiency was high throughout the crop and varied between 87%  
177 and 92% (Table 2).



178 Regarding biomass production, the treatments with Nit+Amm and Nit showed a significant  
179 increase in fresh weight from  $245 \pm 35$  g to  $896 \pm 123$  g and from  $253 \pm 7$  g to  $751 \pm 51$  g,  
180 respectively, while the control group did not show a significant increase in biomass (Fig.  
181 4). In this way, RAS cultivation systems reached a yield between  $6.6$  and  $8.3$  kg m<sup>-2</sup>, with  
182 no observed significant differences between treatments.

183

184

## 185 **Discussion**

186 This study determined that the *Salicornia neei* substrate interaction is an effective strategy  
187 for the recovery of nitrogen compounds contained in saline effluent typical of marine  
188 aquaculture. As shown in recent research, the integration of halophytes as a biofilter in  
189 recirculating systems in marine aquaculture is an adequate alternative to decontaminating  
190 waters with increased nitrogen compounds. In addition, this plant type offers  
191 characteristics that are favourable in various markets (e.g.: for pharmaceuticals, biofuel  
192 and human and animal food) [16, 33].

193

## 194 **Effluent characteristics**

195 Physicochemical parameters of the effluent, such as temperature and pH, showed  
196 significant differences between treatments and between inputs. For Liang et al. [34], these  
197 factors are especially important in the treatment of saline wastewater because they can  
198 affect the determinant processes in the removal of nitrogen compounds. In this study,  
199 temperature and pH were maintained within the optimal ranges (20-21 °C and 7.8-8.2)  
200 and therefore did not affect the nutrient removal processes (Table 1). This finding is  
201 consistent with Lee et al. [35], who reported that, for denitrification processes in wetland  
202 systems, the optimal temperature ranges between 20 and 40 °C and the optimal pH is  
203 approximately 8.0. Another important parameter evaluated in this study was the high  
204 effluent salinity, which reached concentrations of up to 50 g L<sup>-1</sup> of NaCl. This increase was  
205 mainly due to the known environmental factor of evapotranspiration (Table 1), consistent  
206 with a study by Freedman et al. [36], who found increased salinity of treated water in

207 artificial wetlands despite the salt uptake by plants due to soil evaporation and plant  
208 transpiration.

209

## 210 **Nutrient removal**

211 An extensive variety of plants adapted to salinity can be used to treat saline wastewater  
212 [37]. In this study, *S. neei* was selected to aid in nitrogen removal, mainly due to its natural  
213 occurrence throughout much of the South Pacific coast of South America [38]. The use of  
214 artificial wetland systems with *S. neei* shown that it could be an efficient procedure to  
215 eliminate of nitrogenous waste from aquaculture. Since, the daily removal rate recorded in  
216 this study was up to 2.9 mg L d<sup>-1</sup> (Table 2), values higher than those reported with other  
217 halophyte species in high salinity [14]. Studies in related species have reported that they  
218 have the ability to contain nitrogenous compounds in the form of nitrate and ammonium in  
219 the vacuoles of plant cells [39], even in the presence of nitrate reductase (NR) and  
220 glutamine synthetase (GS) [40].

221 Furthermore, it is known that members of the Chenopodiaceae family, such as *Salicornia*  
222 *brachiata* and *Sarcobatus vermiculatus*, have special physiological and morphological  
223 adaptations [41] that allow them to consume, store (typically in shoots); and efficiently use  
224 a wide variety of nitrogen compounds available in the soil [42]. Therefore, it is suggested  
225 that *S. neei* due to its natural growth in saline soils with scarce nitrification processes, but  
226 with the presence of more stable forms of N such as NH<sub>4</sub><sup>+</sup> also should be have these  
227 adaptations [43 - 48].

228

229 Nitrogen bioaccumulation was not determined empirically in this study but can be derived  
230 from related studies. For example, in the *S. neei* Riquelme et al. [22] show, from an  
231 experimental study, that the total of N fixed in the aerial part of wild plants corresponds to  
232  $1.76 \pm 0.08$  g per 100 g of fresh weight. Similar results were obtained in *S. brachiata* by  
233 Rathore et al. [41] from India. Thus, we estimated that the total concentration of  
234 nitrogenous nutrients fixed in *S. neei* at the end of the trial would be between 46 and 103.9  
235 g for the Nit treatment. While for Amm + Nit, the oscillatory fixation between 57.8 and  
236 130.1 g of N for the total biomass formed by this treatment, indicating that *S. neei* could be  
237 assimilated most of the nitrogen available in this test. According to these results, it can  
238 also be suggested that *S. neei* could store ammonium -N, if the differences of the  
239 estimate in the two treatments are considered (approximately 20% more N with the Amm  
240 + Nit treatment). This being a reflection of the synergy produced by these two compounds  
241 when consumed at the same time [49]. However some researchers currently believe that  
242 the actual absorption may represent only a relatively small fraction of the global rate of  
243 nitrogen (N) elimination [50] and microorganisms that play the most important role in the  
244 use and transformation of nitrogen component [51].

245 In response to this uncertainty, other researchers have studied and obtained low removal  
246 rates by plants. Specifically, Tanner et al. [52] found that of the total nitrogen removed by  
247 planted wetland systems, only 25% corresponded to fixation in plants. Likewise, Lin et al.  
248 [32] observed that of the 73% of nitrogen removed, only 11% had been fixed in plants.  
249 Notwithstanding the above, Webb et al. [25], observed significant differences between the  
250 nitrogen removal capacity in beds planted with and without halophytes. In their study, they  
251 demonstrated a higher removal yield in planted beds ( $62.0 \pm 34.6$  mmol N m<sup>-2</sup> d<sup>-1</sup>) than in  
252 unplanted beds ( $23.0 \pm 26.8$  mmol N m<sup>-2</sup> d<sup>-1</sup>). Therefore, it can be inferred that the strong

253 root system formed by this class of plants supports the establishment of certain  
254 microorganisms that, acting synergistically, improve the removal rate of nitrogen loads.  
255 Thus, it is not possible to determine whether plants or microorganisms have the more  
256 important role in the performance of natural removal systems, but they should be  
257 considered elements with significant functions to fulfil.

258

### 259 **Biomass formation**

260 The formation of *S. neei* biomass during the evaluation period reached a total net weight  
261 of 13.4 kg and 14.9 kg m<sup>-2</sup> over a period of six weeks in the treatment irrigated Nit+Amm.  
262 These high yields in biomass production are comparable to those obtained by Ventura et  
263 al. [53], whose yields for *Salicornia persica* reached 16 kg m<sup>-2</sup> in a span of 24 weeks. On  
264 the other hand, *S. neei* plants remained vigorous throughout the evolution period, even at  
265 high salinity concentrations close to 50 g L<sup>-1</sup> of NaCl. This inherent feature of halophytes  
266 highlights the powerful response mechanisms to abiotic stress triggered by *S. neei*,  
267 reinforcing the feasibility of including this plant for Aquaculture effluent treatment, because  
268 salinity concentrations in the effluent can vary greatly in a single day due to environmental  
269 factors such as temperature and rainfall. Regarding removal of the two sources of  
270 nitrogen compounds, there was a positive interaction between the ammonium/nitrate  
271 supplied for biomass formation of *S. neei*. This positive interaction could be caused by the  
272 contribution of the nitrate ion that would act as an important osmotic anion for expansion  
273 of the foliar cells [54]. In contrast to the above, in this study, we found that irrigating with  
274 only NH<sub>4</sub><sup>+</sup> as a nutrient source (unpublished data) caused a decrease in the initial biomass  
275 in *S. neei* plants, indicating some toxicity. This finding agrees with Helali et al. [55], who  
276 indicate that ammonia, when supplied as the sole nitrogen source, induces toxicity in

277 plants, evidenced by reduced growth and low biomass. Regarding the influence of the  
278 contribution of nitrate, *S. neei* was also able to use this nutrient source for biomass  
279 formation and consequently remove nitrate from the irrigation water. This again allows us  
280 to infer the ability of *S. neei* to grow and capture nitrogen nutrients from different sources.  
281 Finally, we observed that the removal times were similarly accelerated with the two  
282 nutrient sources, as indicated by the increase in biomass (Fig. 5).

283

## 284 **Conclusions**

285

286 Our results reveal that the integration of *S. neei* into artificial wetlands with recirculating  
287 aquaculture effluent would be a viable alternative for eliminating nutrient loads in saline  
288 wastewater and that this plant could be included in marine RASs. In addition, the ability of  
289 *S. neei* to thrive with both N forms is an important trait that is likely to confer high growth  
290 and yield potential in association with artificial wetlands.

291

292 *S. neei* is capable of using effluent similar to that produced in marine aquaculture as a  
293 nutrient source, which suggests that *S. neei* has a well-developed molecular mechanism  
294 that allows it to use different N sources and that this characteristic is due to the ability of  
295 halophytes themselves to survive in extreme conditions.

296

297 In a system where halophytic plants such as *S. neei* are used to decontaminate water  
298 from marine aquaculture, the nitrogen removal time is expected to decrease as a result of  
299 increased biomass.

300

301 **Author Contributions**

302 JAG and JO conceived and designed the study. AO performed the experiments. MRD  
303 performed the data analysis and write the manuscript with the help of JAG. JO edited and  
304 revised manuscript. All authors read and approved the final manuscript.

305 **Funding**

306 This research was supported by a FIC BIP 30154272 grant from the “Gobierno regional de  
307 Valparaíso” (Chile).

308 **Availability of data and materials**

309 Not applicable.

310 **Ethics approval and consent to participate**

311 Not applicable.

312 **Consent for publication**

313 Not applicable.

314 **Competing interests**

315 The authors declare that they have no competing interests.

316

317  
318  
319  
320  
321  
322  
323  
324

## Tables

**Table 1 Temperature, pH, and salinity (mean  $\pm$  SE) recorded at the effluent of the culture systems (lysimeter, n=15) with *Salicornia neei*. Salinity is expressed as gram of natrium chloride per liter ( $\text{g L}^{-1}$  of NaCl). Each Input corresponds to the treatments irrigated nitrate and ammonium (Nit + Amm) and nitrate (Nit). Control: irrigated with sea water only.**

| Input | Treatment | Temperature<br>( $^{\circ}\text{C}$ ) | pH            | Salinity<br>( $\text{g L}^{-1}$ of NaCl) |
|-------|-----------|---------------------------------------|---------------|------------------------------------------|
| 1     | Nit + Amm | 18.2 $\pm$ 4.2                        | 8.2 $\pm$ 0.1 | 40.6 $\pm$ 2.2                           |
|       | Nit       | 19.5 $\pm$ 4.7                        | 8.2 $\pm$ 0.1 | 41.3 $\pm$ 1.9                           |
|       | Control   | 19.1 $\pm$ 4.3                        | 8.2 $\pm$ 0.1 | 40.0 $\pm$ 0.0                           |
| 2     | Nit + Amm | 18.8 $\pm$ 1.6                        | 8.1 $\pm$ 0.1 | 44.9 $\pm$ 2.3                           |
|       | Nit       | 21.7 $\pm$ 3.3                        | 8.1 $\pm$ 0.1 | 48.4 $\pm$ 2.2                           |
|       | Control   | 18.6 $\pm$ 1.5                        | 8.0 $\pm$ 0.1 | 43.6 $\pm$ 2.1                           |
| 3     | Nit + Amm | 20.8 $\pm$ 0.6                        | 7.9 $\pm$ 0.1 | 48.5 $\pm$ 2.5                           |
|       | Nit       | 21.2 $\pm$ 0.8                        | 7.9 $\pm$ 0.1 | 48.8 $\pm$ 3.2                           |
|       | Control   | 20.8 $\pm$ 0.5                        | 8.0 $\pm$ 0.1 | 43.6 $\pm$ 2.1                           |
| 4     | Nit + Amm | 20.2 $\pm$ 1.2                        | 8.0 $\pm$ 0.1 | 47.5 $\pm$ 1.9                           |
|       | Nit       | 20.6 $\pm$ 1.4                        | 8.0 $\pm$ 0.1 | 47.5 $\pm$ 2.1                           |
|       | Control   | 20.3 $\pm$ 1.2                        | 8.2 $\pm$ 0.1 | 46.5 $\pm$ 2.6                           |
| 5     | Nit + Amm | 20.6 $\pm$ 0.6                        | 8.0 $\pm$ 0.1 | 48.0 $\pm$ 2.2                           |
|       | Nit       | 20.9 $\pm$ 0.7                        | 7.9 $\pm$ 0.1 | 47.7 $\pm$ 2.4                           |
|       | Control   | 20.7 $\pm$ 0.5                        | 8.2 $\pm$ 0.1 | 46.5 $\pm$ 1.6                           |



325  
326  
327  
328  
329

**Table 2 Nitrate-nitrogen (NO<sub>3</sub><sup>-</sup> -N) concentration at the influent (Ci) and effluent (Co), nutrient removal efficiency (RE) and daily removal rate (RR) for each treatment (lysimeter, n=15) with *Salicornia neei*. Mean values are displayed (± SE). Each Input corresponds to the treatments irrigated with nitrate and ammonium (Nit + Amm) and nitrate (Nit). Control: irrigated with sea water only.**

| Input | Treatment | Ci<br>(mg L <sup>-1</sup> ) | Co<br>(mg L <sup>-1</sup> ) | RE<br>(%) | RR<br>(mg L <sup>-1</sup> ) |
|-------|-----------|-----------------------------|-----------------------------|-----------|-----------------------------|
| 1     | Nit + Amm | 14.20 ± 0.75                | 1.9 ± 0.17                  | 86.6      | 2.2 ± 0.21                  |
|       | Nit       | 15.30 ± 0.86                | 1.6 ± 0.66                  | 89.3      | 2.8 ± 0.37                  |
| 2     | Nit + Amm | 12.90 ± 0.60                | 1.6 ± 0.15                  | 87.3      | 2.2 ± 0.20                  |
|       | Nit       | 16.49 ± 1.21                | 1.6 ± 0.17                  | 90.3      | 3.7 ± 0.36                  |
| 3     | Nit + Amm | 12.89 ± 0.70                | 1.1 ± 0.05                  | 91.7      | 2.3 ± 0.28                  |
|       | Nit       | 13.18 ± 0.66                | 1.2 ± 0.15                  | 91.1      | 2.4 ± 0.25                  |
| 4     | Nit + Amm | 14.28 ± 0.70                | 1.6 ± 0.10                  | 88.8      | 2.6 ± 0.28                  |
|       | Nit       | 16.80 ± 0.65                | 1.5 ± 0.05                  | 90.9      | 2.7 ± 0.26                  |
| 5     | Nit + Amm | 14.20 ± 0.69                | 1.5 ± 0.05                  | 89.4      | 2.9 ± 0.21                  |
|       | Nit       | 13.36 ± 0.57                | 1.7 ± 0.05                  | 87.5      | 2.6 ± 0.15                  |

330  
331

Figures

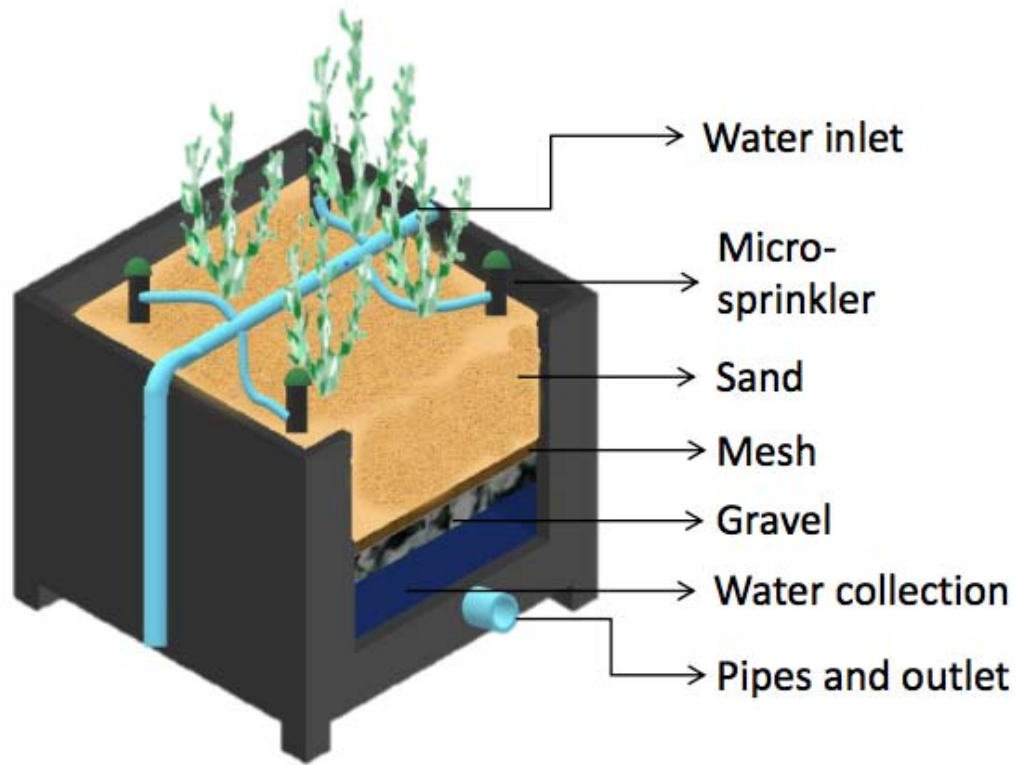

332  
333

334  
335  
336

**Fig. 1.** The diagram shows the design of one lysimeter, depicting the overall construction, water inlet and outlet, substrate (sand and gravel separated by a mesh), and irrigation micro-sprinklers.

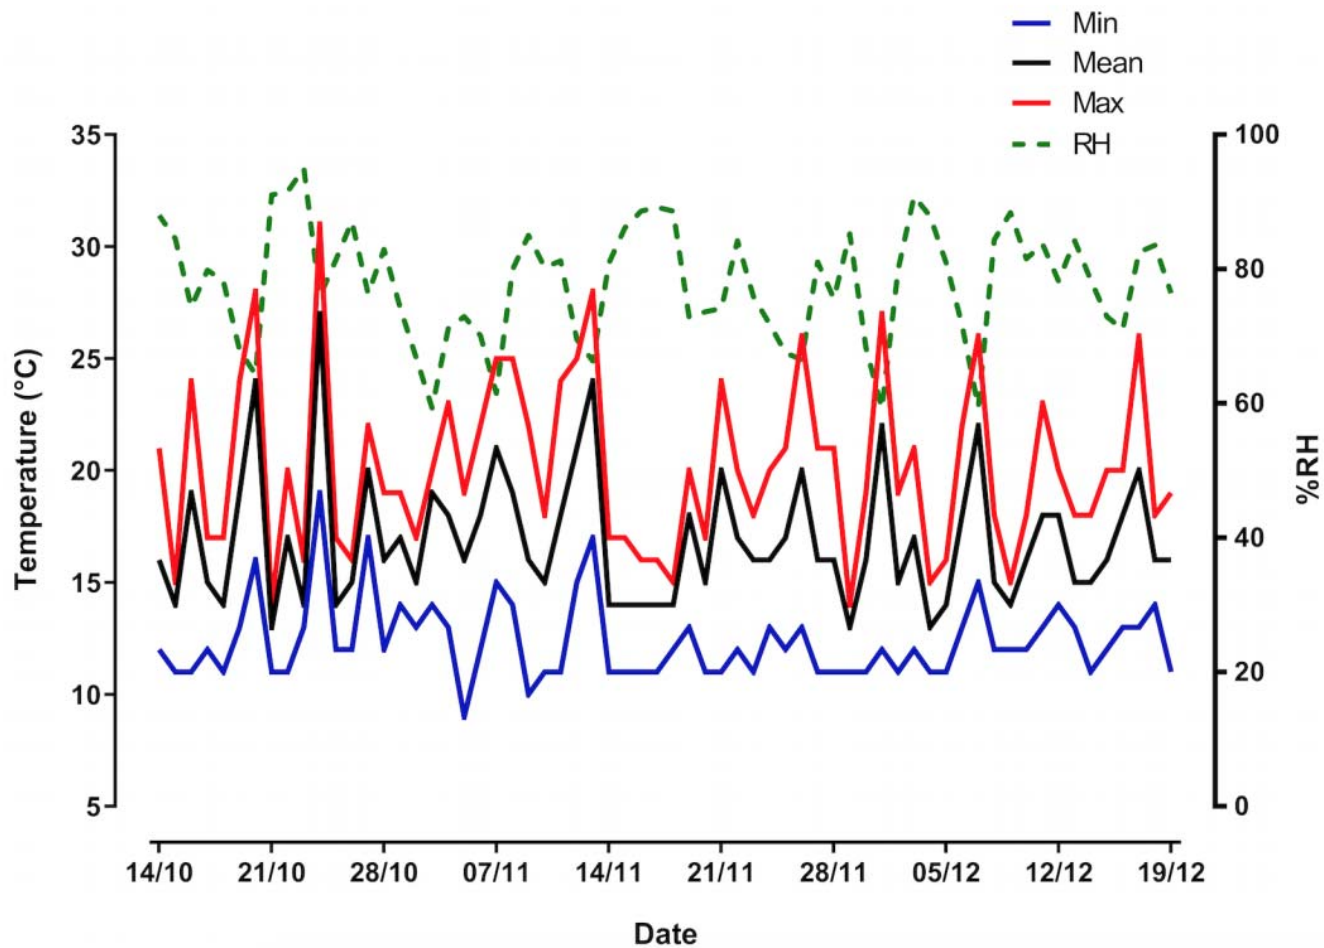

337

338 **Fig. 2.** Ambient temperature (°C) and relative humidity (%RH) during the date of experimentation. The graphic shows mean,  
339 maximum and minimum values for the ambient temperature, over 74 days.

340

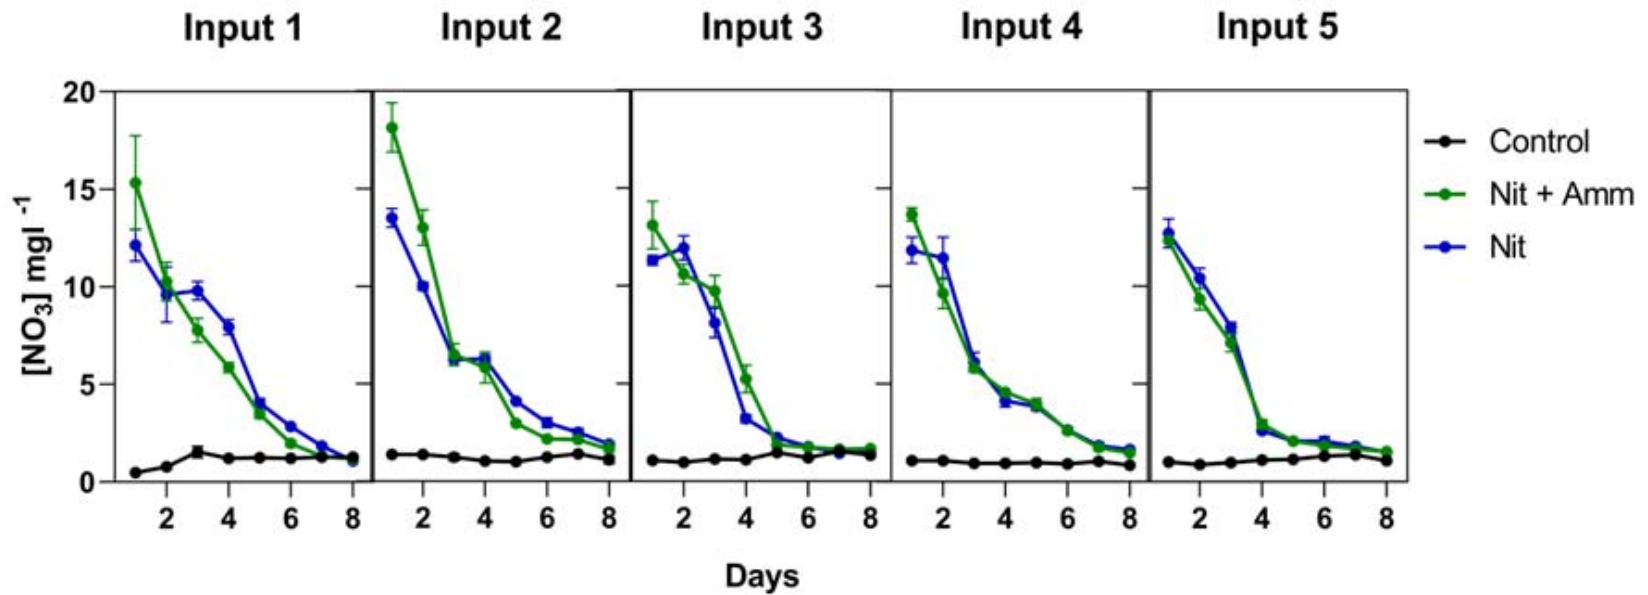

341  
 342 **Fig. 3.** Nitrate-nitrogen ( $\text{NO}_3^-$ -N) load in the lysimeters, expressed in  $\text{mg L}^{-1}$  and observed over 74 days of experimentations.  
 343 Each Input corresponds to the treatments irrigated with nitrate and ammonium (Nit + Amm) and nitrate (Nit). Control:  
 344 Irrigated with sea water only.  
 345  
 346

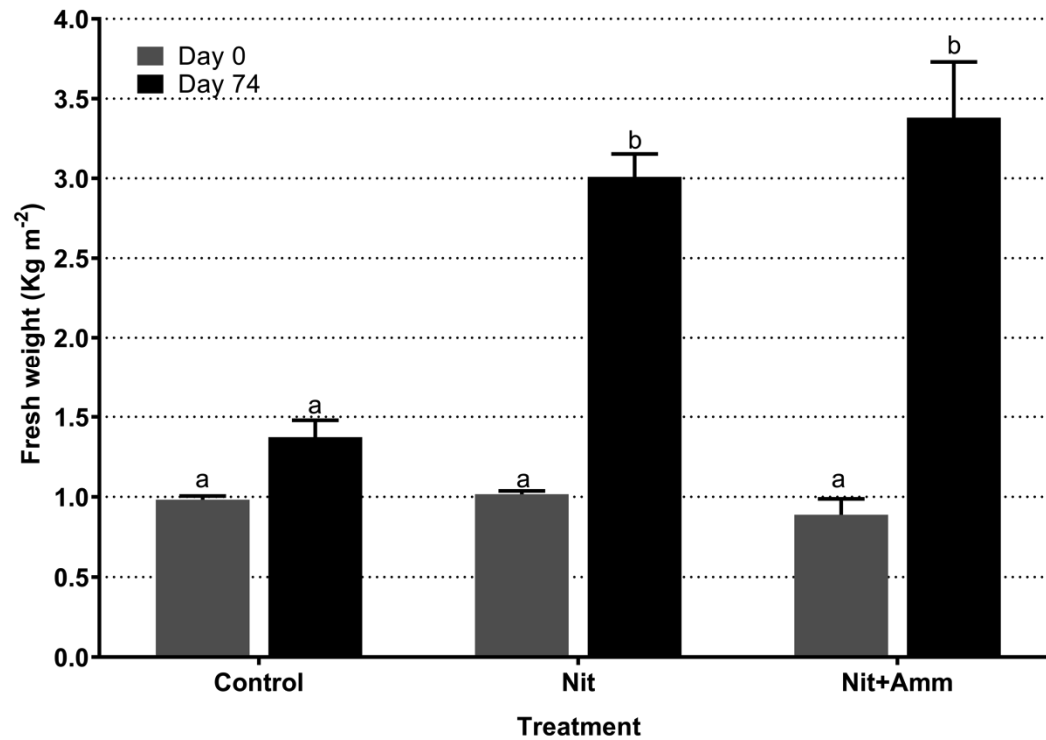

347

348 **Fig. 4.** Production of biomass of *Salicornia neei* expressed as yield of fresh weight (FW) per area unit (FW kg m<sup>-2</sup>). Each  
 349 Input corresponds to the treatments irrigated with nitrate and ammonium (Nit + Amm) and nitrate (Nit). Control: treatment  
 350 with sea water only. Lower-case letters represents significant differences between treatments.

351

352  
353  
354  
355  
356  
357  
358  
359  
360  
361  
362  
363  
364  
365  
366  
367  
368

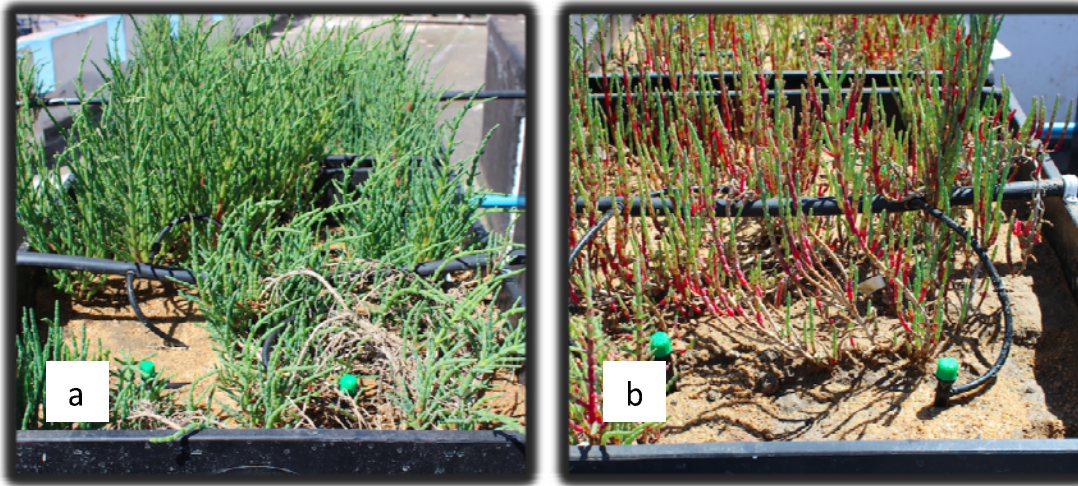

369 **Fig. 5:** Picture of two lysimeters with *Salicornia neei* at the end of the experiment (day 74). **a** irrigated with nitrate and  
370 ammonium. **b** irrigated with sea-water.

## 371 References

- 372 1. Tovar A, Moreno C, Manuel-Vez MP, Garcia-Vargas M. Environmental impacts of  
373 intensive aquaculture in marine waters. *Water Res.* 2000; 34(1):334-342.
- 374 2. De Lange HJ, Paulissen M, Slim PA. Halophyte filters: the potential of constructed  
375 wetlands for application in saline aquaculture. *Int J Phytoremediat.* 2013;  
376 15(4):352-364.
- 377 3. Quinta R, Santos R, Thomas DN, Le Vay L. Growth and nitrogen uptake by  
378 *Salicornia europaea* and *Aster tripolium* in nutrient conditions typical of aquaculture  
379 wastewater. *Chemosphere.* 2015; 120:414-421.
- 380 4. Vymazal J. Constructed wetlands for treatment of industrial wastewaters: A review.  
381 *Ecol Eng.* 2014; 73:724-751.
- 382 5. Boxman SE, Nystrom M, Capodice JC, Ergas SJ, Main KL, Trotz MA. Effect of  
383 support medium, hydraulic loading rate and plant density on water quality and  
384 growth of halophytes in marine aquaponic systems. *Aquac Res.* 2017;  
385 48(5):2463-2477.
- 386 6. Carballeira C, De Orte MR, Viana IG, Carballeira A. Implementation of a minimal  
387 set of biological tests to assess the ecotoxic effects of effluents from land-based  
388 marine fish farms. *Ecotox Environ Safe.* 2012; 78:148-161.
- 389 7. Shpigel M, Ben-Ezra D, Shauli L, Sagi M, Ventura Y, Samocha T, et al.  
390 Constructed wetland with *Salicornia* as a biofilter for mariculture effluents. *Aquac.*  
391 2013; 412:52-63.
- 392 8. Zohar Y, Tal Y, Schreier H, Steven C, Stubblefield J, Place A. 10 Commercially  
393 feasible urban recirculating aquaculture: Addressing the Marine Sector. In:  
394 COSTA-PIERCE B, DESBONNET A, EDWARDS P, BAKER D (Eds.), *Urban*  
395 *Aquaculture*, CABI Publishing, Wallingford. 2005; 159-171.
- 396 9. Gutierrez-Wing MT, Malone RF. Biological filters in aquaculture: Trends and  
397 research directions for freshwater and marine applications. *Aquac Eng.* 2006;  
398 34(3):163-171.
- 399 10. Kajimura M, Croke SJ, Glover CN, Wood CM. Dogmas and controversies in the  
400 handling of nitrogenous wastes: The effect of feeding and fasting on the excretion  
401 of ammonia, urea and other nitrogenous waste products in rainbow trout. *J Exp*  
402 *Biol.* 2004; 207(12):1993-2002.
- 403 11. Camargo JA, Alonso A. Ecological and toxicological effects of inorganic nitrogen  
404 pollution in aquatic ecosystems: A global assessment. *Environ Int.* 2006;  
405 32(6):831-849.
- 406 12. Thoman ES, Ingall ED, Davis DA, Arnold CR. A nitrogen budget for a closed,  
407 recirculating mariculture system. *Aquac Eng.* 2001; 24(3):195-211.
- 408 13. Orellana F, Waller U, Wecker B. Culture of yellowtail kingfish (*Seriola lalandi*) in a  
409 marine recirculating aquaculture system (RAS) with artificial seawater. *Aquac Eng.*  
410 2014; 58:20-28.

- 411 14. Brown JJ, Glenn EP, Fitzsimmons KM, Smith SE. Halophytes for the treatment of  
412 saline aquaculture effluent. *Aquac.* 1999; 175(3-4):255-268.
- 413 15. Webb JM, Quinta R, Papadimitriou S, Norman L, Rigby M, Thomas DN, et al.  
414 Halophyte filter beds for treatment of saline wastewater from aquaculture. *Water*  
415 *Res.* 2012; 46(16):5102-5114.
- 416 16. Buhmann A, Papenbrock J. Biofiltering of aquaculture effluents by halophytic  
417 plants: Basic principles, current uses and future perspectives. *Environ Exp Bot.*  
418 2013; 92:122-133.
- 419 17. Forde BG, Clarkson DT. Nitrate and ammonium nutrition of plants: Physiological  
420 and molecular perspectives. *Adv Bot Res.* 1999; 30:1-90.
- 421 18. Cott GM, Caplan JS, Mozdzer TJ. Nitrogen uptake kinetics and saltmarsh plant  
422 responses to global change. *Sci Rep.* 2018; 8: 5393
- 423 19. Hessini K, Ben Hamed K, Gandour M, Mejri M, Abdelly C, Cruz C. Ammonium  
424 nutrition in the halophyte *Spartina alterniflora* under salt stress: evidence for a  
425 priming effect of ammonium? *Plant Soil.* 2013; 370(1-2):163-173.
- 426 20. Jesus JM, Cassoni AC, Danko AS, Fiuza A, Borges MT. Role of three different  
427 plants on simultaneous salt and nutrient reduction from saline synthetic wastewater  
428 in lab-scale constructed wetlands. *Sci Total Environ.* 2017; 579:447-455.
- 429 21. Panta S, Flowers T, Lane P, Doyle R, Haros G, Shabala S. Halophyte agriculture:  
430 Success stories. *Environ Exp Bot.* 2014; 107:71-83.
- 431 22. Riquelme J, Olaeta JA, Galvez L, Undurraga P, Fuentealba C, Osses A, et al.  
432 Nutritional and functional characterization of wild and cultivated *Sarcocornia neei*  
433 grown in Chile. *Cienc Investig Agrar.* 2016; 43(2):283-293.
- 434 23. Turcios AE, Papenbrock J. Sustainable Treatment of Aquaculture Effluents-What  
435 Can We Learn from the Past for the Future? *Sustainability.* 2014; 6(2):836-856.
- 436 24. Vymazal J. Constructed wetlands for wastewater treatment. *Ecol Eng.* 2005,  
437 25(5):475-477.
- 438 25. Webb JM, Quinta R, Papadimitriou S, Norman L, Rigby M, Thomas DN, et al. The  
439 effect of halophyte planting density on the efficiency of constructed wetlands for the  
440 treatment of wastewater from marine aquaculture. *Ecol Eng.* 2013; 61:145-153.
- 441 26. Quinta R, Hill PW, Jones DL, Santos R, Thomas DN, Le Vay L. Uptake of an amino  
442 acid (alanine) and its peptide (trialanine) by the saltmarsh halophytes *Salicornia*  
443 *europaea* and *Aster tripolium* and its potential role in ecosystem N cycling and  
444 marine aquaculture wastewater treatment. *Ecol Eng.* 2015, 75:145-154.
- 445 27. Waller U, Buhmann AK, Ernst A, Hanke V, Kulakowski A, Wecker B, et al.  
446 Integrated multi-trophic aquaculture in a zero-exchange recirculation aquaculture  
447 system for marine fish and hydroponic halophyte production. *Aquac Int.* 2015;  
448 23(6):1473-1489.
- 449 28. Valladao GMR, Gallani SU, Pilarski F. South American fish for continental  
450 aquaculture. *Rev Aquac.* 2018; 10(2):351-369.



- 451 29. Alonso MF, Orellana C, Valdes S, Diaz FJ. Effect of salinity on the germination of  
452 *Sarcocornia neei* (Chenopodiaceae) from two contrasting habitats. Seed Sci  
453 Technol. 2017; 45(1):252-258.
- 454 30. de Souza MM, Mendes CR, Doncato KB, Badiale-Furlong E, Costa CSB. Growth,  
455 Phenolics, Photosynthetic Pigments, and Antioxidant Response of Two New  
456 Genotypes of Sea Asparagus (*Salicornia neei* Lag.) to Salinity under Greenhouse  
457 and Field Conditions. Agriculture-Basel. 2018; 8(7).
- 458 31. De Lange HJ, Paulissen M. Efficiency of three halophyte species in removing  
459 nutrients from saline water: a pilot study. Wetl Ecol Manag. 2016; 24(5):587-596.
- 460 32. Lin YF, Jing SR, Lee DY, Wang TW. Nutrient removal from aquaculture wastewater  
461 using a constructed wetlands system. Aquac. 2002; 209(1-4):169-184.
- 462 33. Peng L, Hua Y, Cai J, Zhao J, Zhou W, Zhu D. Effects of plants and temperature on  
463 nitrogen removal and microbiology in a pilot-scale integrated vertical-flow wetland  
464 treating primary domestic wastewater. Ecol Eng. 2014; 64:285-290.
- 465 34. Liang YX, Zhu H, Banuelos G, Yan BX, Zhou QW, Yu XF, et al. Constructed  
466 wetlands for saline wastewater treatment: A review. Ecol Eng. 2017; 98:275-285.
- 467 35. Lee CG, Fletcher TD, Sun GZ. Nitrogen removal in constructed wetland systems.  
468 Eng Life Sci. 2009; 9(1):11-22.
- 469 36. Freedman A, Gross A, Shelef O, Rachmilevitch S, Arnon S. Salt uptake and  
470 evapotranspiration under arid conditions in horizontal subsurface flow constructed  
471 wetland planted with halophytes. Ecol Eng. 2014; 70:282-286.
- 472 37. El Shaer HM. Halophytes and salt-tolerant plants as potential forage for ruminants  
473 in the Near East region. Small Ruminant Res. 2010; 91(1):3-12.
- 474 38. Alonso MA, Crespo MB. Taxonomic and nomenclatural notes on South American  
475 taxa of *Sarcocornia* (Chenopodiaceae). Ann Bot Fenn. 2008; 45(4):241-254.
- 476 39. Martinoia E, Heck U, Wiemken A. Vacuoles as storage compartments for nitrate in  
477 barley leaves. Nature. 1981; 289(5795):292-294.
- 478 40. Ferrari TE, Yoder OC, Filner P. Anaerobic nitrite production by plant cells and  
479 tissues: evidence for two nitrate pools. Plant Physiol. 1973; 51: 423-431
- 480 41. Rathore AP, Chaudhary DR, Jha B. Biomass production, nutrient cycling, and  
481 carbon fixation by *Salicornia brachiata* Roxb.: A promising halophyte for coastal  
482 saline soil rehabilitation. Int J Phytoremediat. 2016; 18(8):801-811.
- 483 42. Donovan LA, Richards JH, Schaber EJ. Nutrient relations of the halophytic shrub,  
484 *Sarcobatus vermiculatus*, along a soil salinity gradient. Plan Soil. 1997;  
485 190(1):105-117.
- 486 43. Akhtar M, Hussain F, Ashraf MY, Qureshi TM, Akhter J, Awan AR. Influence of  
487 Salinity on Nitrogen Transformations in Soil. Commun Soil Sci Plant. 2012;  
488 43(12):1674-1683.
- 489 44. Lodhi A, Arshad M, Azam F, Sajjad MH. Changes in mineral and mineralizable n of  
490 soil incubated at varying salinity, moisture and temperature regimes. Pak J Bot.  
491 2009; 41(2):967-980.

- 492 45. Yokoishi T, Tanimoto S. Seed-germination of the halophyte *Suaeda-japonica*  
493 under salt stress. *Int J Plant Res.*1994; 107(1088):385-388.
- 494 46. Liu Y, von Wiren N. Ammonium as a signal for physiological and morphological  
495 responses in plants. *J Exp Bot.* 2017; 68(10):2581-2592.
- 496 47. Marino D, Moran JF. Can Ammonium Stress Be Positive for Plant Performance?.  
497 *Front Plant Sci.*2019; 10.
- 498 48. Patterson K, Cakmak T, Cooper A, Lager I, Rasmusson AG, Escobar MA. Distinct  
499 signalling pathways and transcriptome response signatures differentiate  
500 ammonium- and nitrate-supplied plants. *Plant Cell Environ.* 2010;  
501 33(9):1486-1501.
- 502 49. Hachiya T, Sakakibara H. Interactions between nitrate and ammonium in their  
503 uptake, allocation, assimilation, and signaling in plants. *J Exp Bot.* 2017;  
504 68(10):2501-2512.
- 505 50. Kadlec RH, Wallace S. Treatment wetlands. Lewis publishers, CRC press. 2008;  
506 257-347.
- 507 51. Margesin R, Schinner F. Potential of halotolerant and halophilic microorganisms for  
508 biotechnology. *Extremophiles.* 2001; 5(2):73-83.
- 509 52. Tanner CC, Kadlec RH, Gibbs MM, Sukias JPS, Nguyen ML. Nitrogen processing  
510 gradients in subsurface-flow treatment wetlands - influence of wastewater  
511 characteristics. *Ecol Eng.* 2002; 18(4):499-520.
- 512 53. Ventura Y, Wuddineh WA, Myrzabayeva M, Alikulov Z, Khozin-Goldberg I, Shpigel  
513 M, et al. Effect of seawater concentration on the productivity and nutritional value of  
514 annual *Salicornia* and perennial *Sarcocornia* halophytes as leafy vegetable crops.  
515 *Sci Hortic-Amsterdam.* 2011; 128(3):189-196.
- 516 54. Raab T, Terry N. Nitrogen source regulation of growth and photosynthesis in *Beta*  
517 *vulgaris* L. *Plant Physiol.* 1994; 10:1159–1166
- 518 55. Helali SM, Nebli H, Kaddour R, Mahmoudi H, Lachaal M, Ouerghi Z. Influence of  
519 nitrate-ammonium ratio on growth and nutrition of *Arabidopsis thaliana*. *Plant Soil.*  
520 2010; 336(1-2):65-74.
